# Supplementary material for: Dissemination of macrolides, fusidic acid and mupirocin resistance among Staphylococcus aureus clinical isolates
Source: PubMed Central journal article supplement (PMC5601635; doi:10.18632/oncotarget.19491), 2017-07-22
Supplement: oncotarget-08-58086-s001.pdf [file oncotarget-08-58086-s001.pdf]

## Dissemination of macrolides, fusidic acid and mupirocin resistance among *Staphylococcus aureus* clinical isolates

### SUPPLEMENTARY MATERIALS

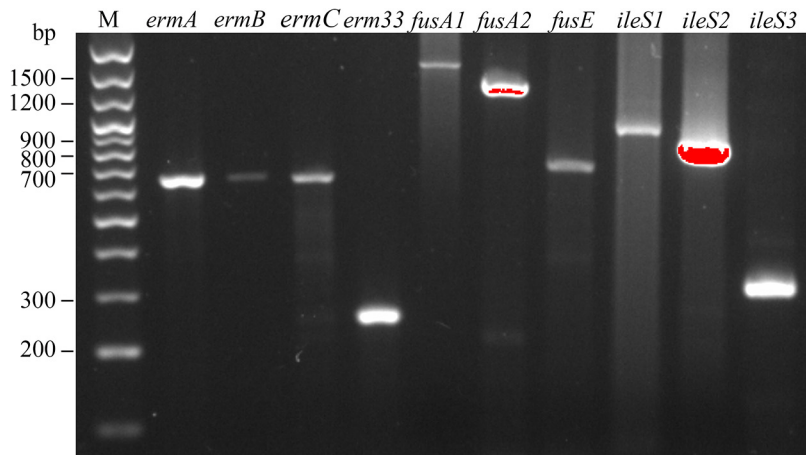

**Supplementary Figure 1: The electrophoretogram of 7 resistant determinants of macrolides, fusidic acid and mupirocin.** The *ermA*, *ermB*, *ermC* and *erm33* were belonged to macrolides; *fusA1*, *fusA2* and *fusE* to fusidic acid; and *ileS1*, *ileS2* and *ileS3* to mupirocin.
